# Supplementary material for: Perfect chronic skeletal muscle regeneration in adult spiny mice, Acomys cahirinus
Source: PubMed Central journal article supplement (PMC5995887; doi:10.1038/s41598-018-27178-7), 2018-06-11
Supplement: 41598_2018_27178_MOESM1_ESM.pdf [file 41598_2018_27178_MOESM1_ESM.pdf]

SUPPLEMENTARY INFORMATION

MANUSCRIPT TITLE: **Perfect chronic skeletal muscle regeneration in adult spiny mice, *Acomys cahirinus*.**

AUTHORS: Malcolm Maden, Jason Orr Brant, Andres Rubiano, Aaron Gabriel W. Sandoval, Chelsey Simmons, Robert Mitchell, Henry Collin-Hooper, Jason Jacobson, Saleh Omairi, Ketan Patel

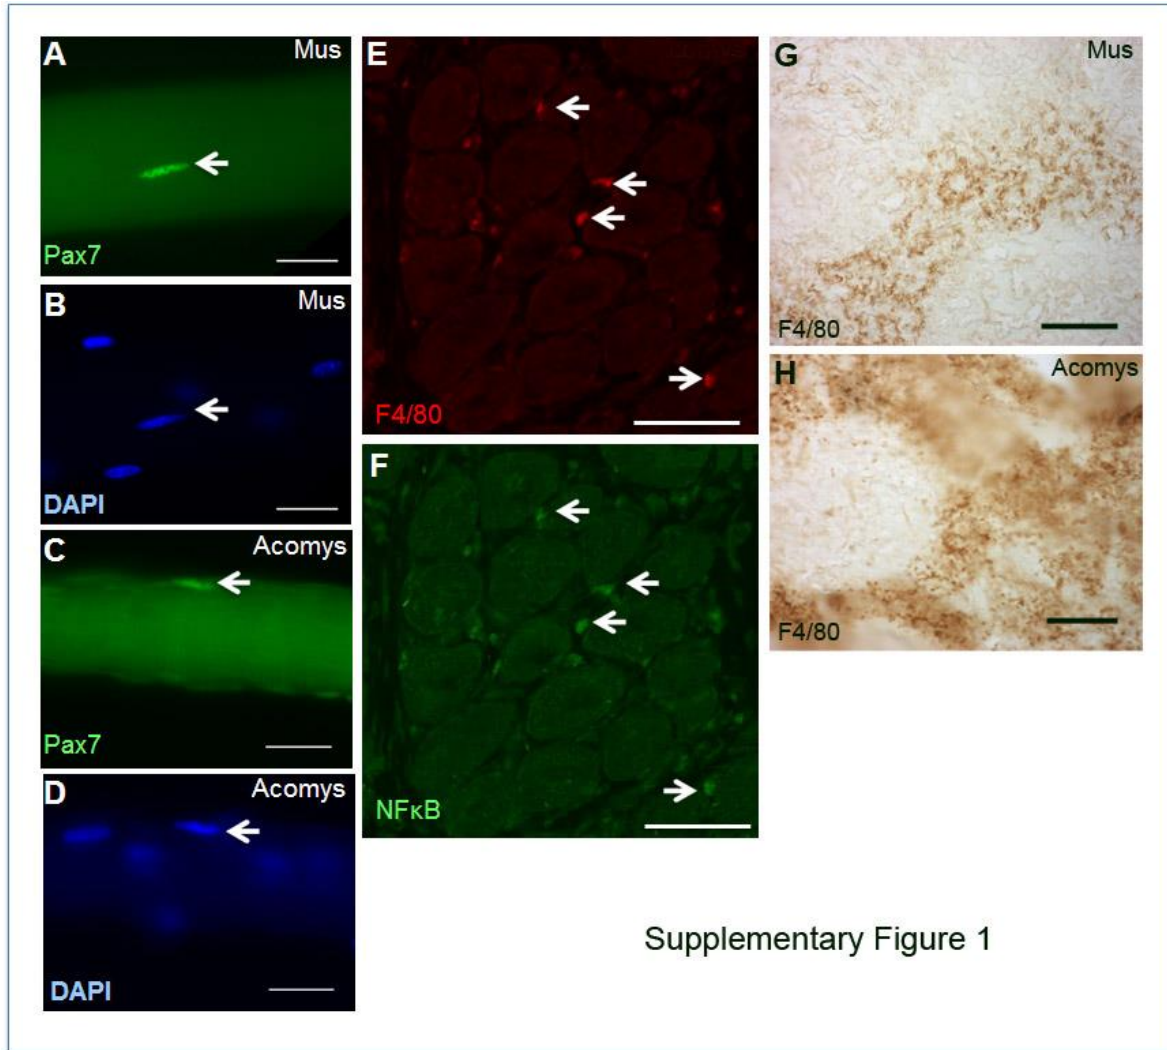

**Supplementary Fig. 1. A-D** Single fibre immunostaining for expression of satellite cells marker Pax7 on freshly isolated *M. musculus* (A, B) and *A. cahirinus* (C, D) muscle fibres. Arrows show expression of Pax7 co-localizing to a DAPI stained nuclei. Scale bars = 100µm. **E-F**. Co-localisation of macrophage marker F4/80 to the expression of NFκB (indicated by arrows). Scale bars = 200µm. **G-H**, Immunolocalisation of F4/80 antibody in *M. musculus* (**G**) and *A. cahirinus* (**H**) spleen showing +ve reaction around the follicles. Scale bars = 100µm.

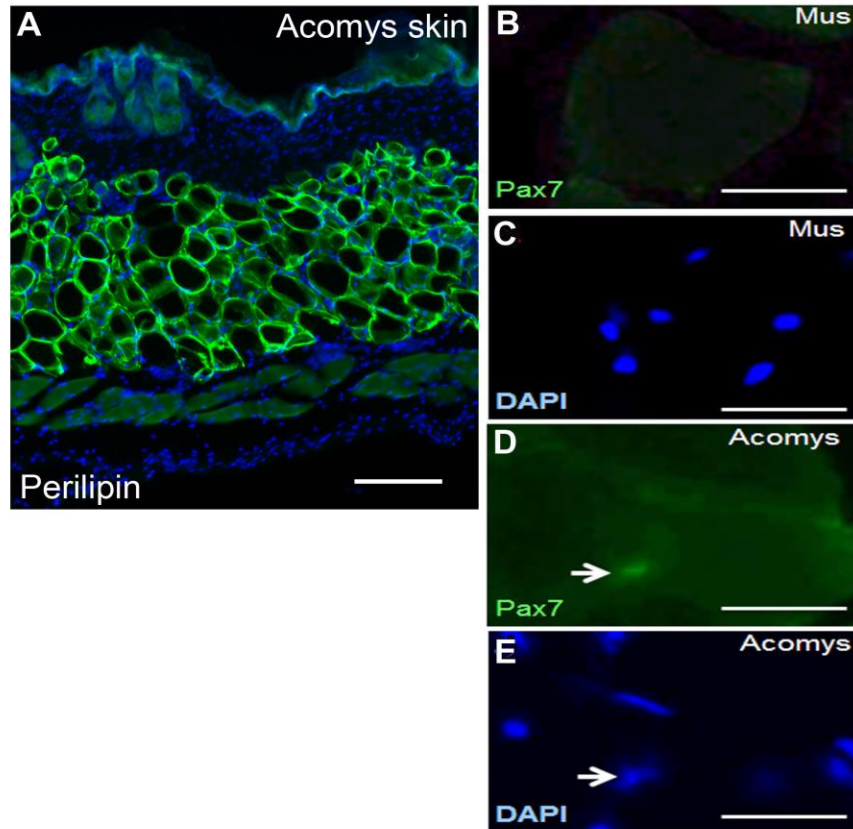

Supplementary Fig. 2. **A** Perilipin immunofluorescence on *A. cahirinus* normal skin showing adipocytes in the hypodermis. Scale bar = 200 $\mu$ m. **B - C** lack of expression of Pax7 in *M. musculus* muscle after five rounds of CTX damage. **D - E** Expression of Pax7 in *A. cahirinus* muscle after five rounds of CTX damage. Scale bars = 100 $\mu$ m.

### Acomys RT Primers

| Gene           | Forward Primer Sequence | Reverse Primer Sequence |
|----------------|-------------------------|-------------------------|
| <i>Myog</i>    | CTTTTCTTCCAGGGGACCTC    | ACCAGGAGCCCCACTTCTAT    |
| <i>Myf5</i>    | CAGCTCAGCTTTGTGTGCTC    | GCTGCCAGTTCTCACCTTCT    |
| <i>MyoD1</i>   | TCTGGCCAAGCGACTCTTAT    | TCCAGTCCTGCGTGTAACAG    |
| <i>Myh3</i>    | ATGTTCGATGGAAGCCAAGAG   | GGTTCCCCAACAGGATTCTC    |
| <i>Col1a1</i>  | GGCTCCTCGTTTTCTTCTT     | CCCTGGAAACAAAGGAGACA    |
| <i>Col3a1</i>  | GACCTCGTGCTCCAGTAAGC    | CTGGACCAAAGGTGATGCT     |
| <i>Col12a1</i> | GTGCGCAAACATCTCAGAA     | CGTACAATGGGCAAGGCTAT    |
| <i>Tgf-B1</i>  | GAGCGCACGATCATGTTG      | CTGCCCCTACATCTGGAGTC    |
| <i>NF-KB</i>   | CTGGGCCAGAATTGGATAAA    | AGGGACTCGTGCATGTTCTC    |
| <i>Cxcl12</i>  | TGGGCTGTTGTGCTTACTTG    | CCAAACTGTGCCCTTCAGAT    |
| <i>Adipoq</i>  | TTAAGGGACCTCTGCCAAGA    | CTGGAGTCACGCCTGTGTTA    |
| <i>Gapdh</i>   | CGACCTTCACCATCTTGTC A   | CCCACCAACCTGGTTCCTAT    |

### Mus RT Primers

| Gene           | Forward Primer Sequence | Reverse Primer Sequence |
|----------------|-------------------------|-------------------------|
| <i>Myog</i>    | ACCAGGAGCCCCACTTCTAT    | GTCCCCAGTCCCTTTTCTTC    |
| <i>Myf5</i>    | CAGCTCAGCTTTGTGTGCTC    | GCCAGTTCTCCCCTTCTGAG    |
| <i>MyoD1</i>   | GCCACTCAGGTCTCAGGTGT    | GCTCTGGCCAAGCAACTCT     |
| <i>Myh3</i>    | ATGAGTAGCGACACCGAGATG   | ACAAAGCAGTAGGTTTTGGCAT  |
| <i>Col1a1</i>  | CTCCTGGCAACAAAGGAGAC    | GAAGGTCCAGGCTCACCAC     |
| <i>Col3a1</i>  | CCTGGCTCAAATGGCTCAC     | GACCTCGTGTTCCGGGTAT     |
| <i>Col12a1</i> | TGCACCTGAGCCATAGAGTG    | ATTCAAGGCCTTCCGAATTT    |
| <i>Tgf-B1</i>  | TGCCCTCTACAACCAACACA    | GTTGGACAACTGCTCCACCT    |
| <i>NF-KB</i>   | TGCACCTGAGCCATAGAGTG    | ATTCAAGGCCTTCCGAATTT    |
| <i>Cxcl12</i>  | TGCATCAGTGACGGTAAACCA   | CACAGTTTGGAGTGTTGAGGAT  |
| <i>Adipoq</i>  | TGTTCTCTTAATCCTGCCCA    | CCAACCTGCACAAGTTCCTT    |
| <i>Gapdh</i>   | TGACCTCAACTACATGGTCTACA | CTTCCCATTCTCGGCCTTG     |

**Supplementary Table 1.** Primer sequences used for qPCR analyses.
